# Supplementary material for: Abnormal Striatal Development Underlies the Early Onset of Behavioral Deficits in Shank3B−/− Mice
Source: PubMed Central journal article supplement — Cell Rep. Author manuscript; Available in PMC 2019 Dec 3. (PMC6889826; doi:10.1016/j.celrep.2019.10.021), 2019-11-12
Supplement: NIHMS1542972-supplement-1.pdf [file NIHMS1542972-supplement-1.pdf]

Cell Reports, Volume 29

## Supplemental Information

### **Abnormal Striatal Development Underlies the Early Onset of Behavioral Deficits in *Shank3B*<sup>-/-</sup> Mice**

**Rui Tiago Peixoto, Lynne Chantranupong, Richard Hakim, James Levasseur, Wengang Wang, Tasha Merchant, Kelly Gorman, Bogdan Budnik, and Bernardo Luis Sabatini**

## Supplemental Figures

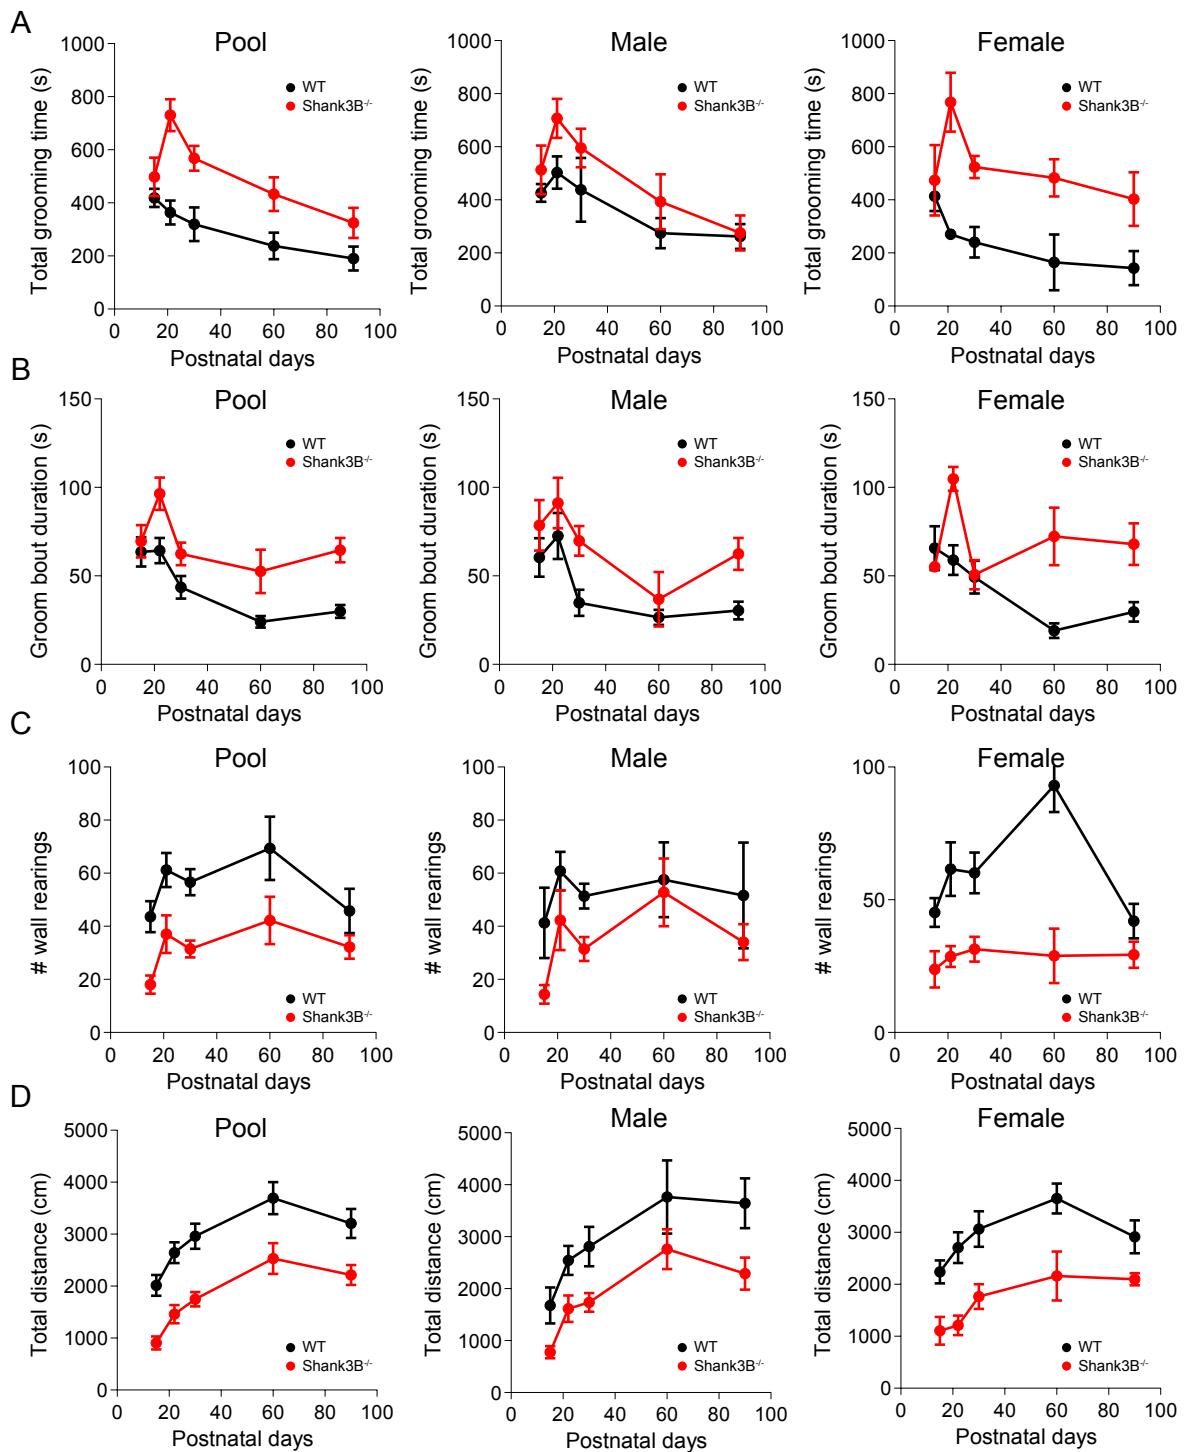

**Supplemental Figure 1** – Related to Figure 1. No sexual dimorphism observed in developing Shank3B<sup>-/-</sup> mice in the open field test. (A) Mean ± SEM of total grooming time by P15-90 WT (black) and Shank3B<sup>-/-</sup> (red) mice during 30 min in open field arena. Left panel - total pool; Center panel – males; Right panel – females. WT: 4 males, 6 females; Shank3B<sup>-/-</sup>: 8 males, 5 females. (B) Mean ± SEM of grooming bout duration P15-90 WT (black) and Shank3B<sup>-/-</sup> (red) mice during 30 min in open field arena. Left panel - total pool; Center panel – males; Right panel – females. WT: 4 males, 6 females; Shank3B<sup>-/-</sup>: 8 males, 5 females. (C) Mean ± SEM of number of wall rearings by P15-90 WT (black) and Shank3B<sup>-/-</sup> (red) mice during 30 min in open field arena. Left panel - total pool; Center panel – males; Right panel – females. WT: 4 males, 6 females; Shank3B<sup>-/-</sup>: 8 males, 5 females. (D) Mean ± SEM of total distance traveled by P15-90 WT (black) and Shank3B<sup>-/-</sup> (red) mice during 30 min in open field arena. Left panel - total pool; Center panel – males; Right panel – females. WT: 4 males, 6 females; Shank3B<sup>-/-</sup>: 8 males, 5 females.

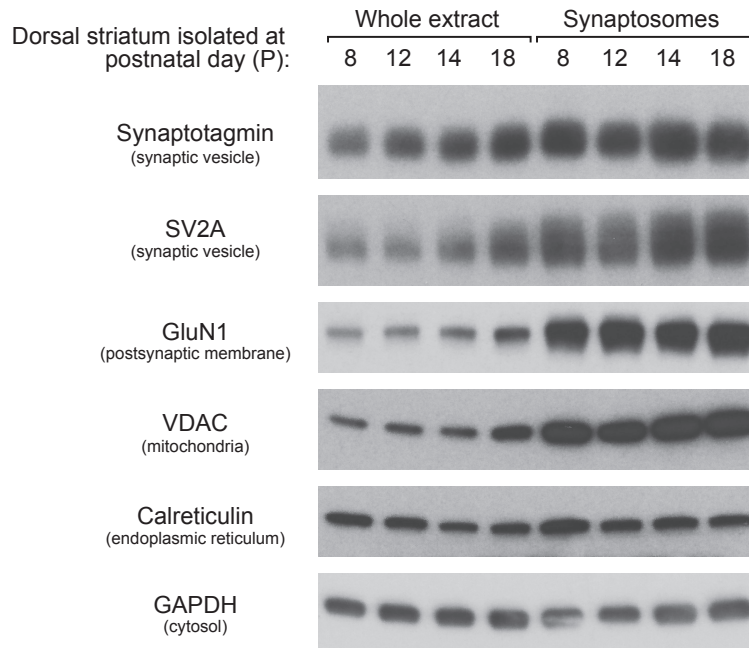

**Supplemental Figure 2** – Related to Figure 2. Immunoblot profiling of striatal synaptosomes across development. Immunoblots against Synaptotagmin, Synaptic vesicle glycoprotein 2A, NR1 (GluN1), Voltage dependent anion channel (VDAC), Calreticulin and Glyceraldehyde 3-phosphate dehydrogenase, performed in whole extracts or synaptosomal fractions collected from mice across the P8-P18 developmental time period.

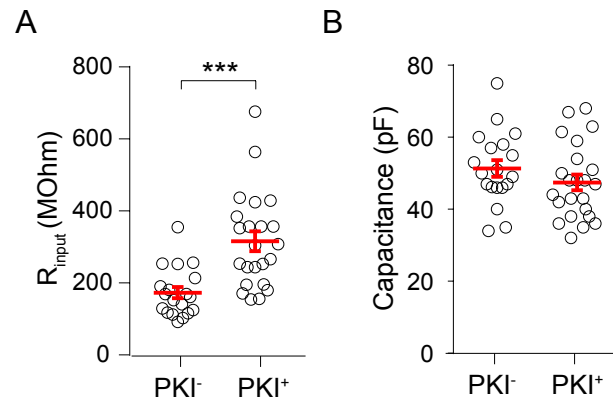

**Supplemental Figure 3** – Related to Figure 4. Expression of PKI $\alpha$  in SPNs during P8-P15 increases membrane resistance. (A) Mean  $\pm$  SEM of input resistance and (B) capacitance of SPNs recorded by whole-cell recordings in coronal brain slices of P15 mice infected with AA8-Syn-PKI $\alpha$ -IRES-mRuby2 in DMS at P8. PKI<sup>+</sup> group represents SPNs expressing PKI $\alpha$  and PKI<sup>-</sup> group corresponds to neighboring uninfected controls. N=19,23 neurons from 5 mice, unpaired Mann-Whitney test, \*\*\*p<0.001.

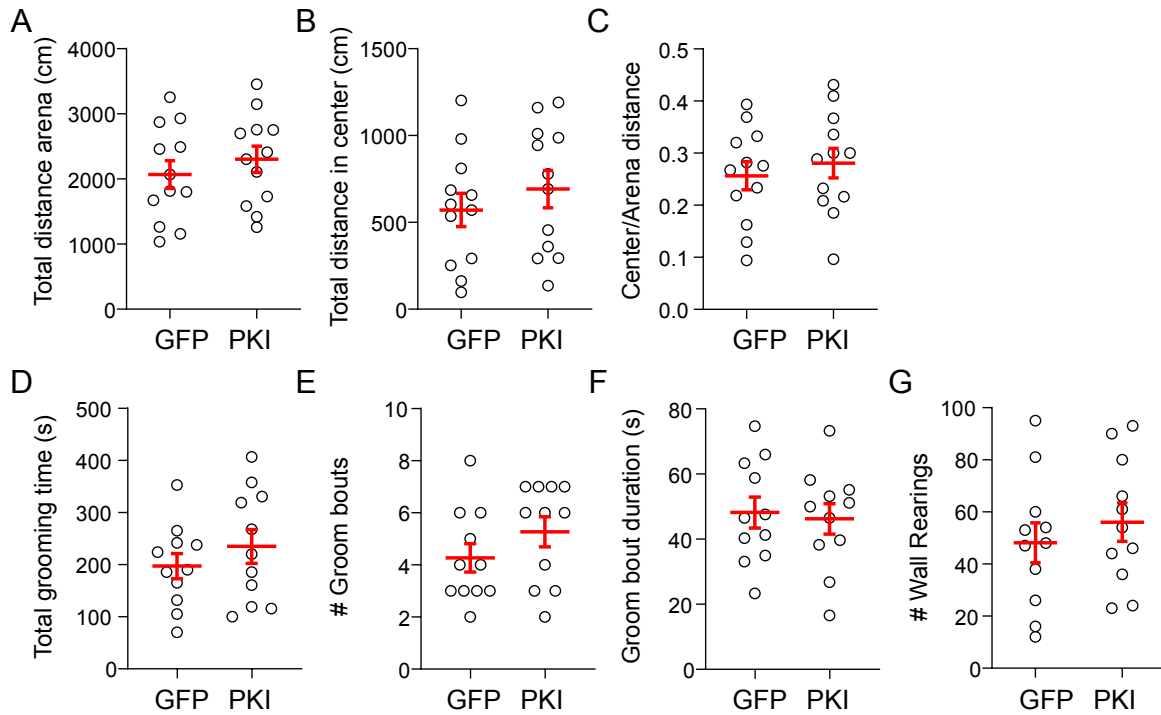

**Supplemental Figure 4** - Related to Figure 5. Postnatal expression of PKI in DMS does not change behavior of WT mice in the open field test. (A) Mean  $\pm$  SEM of total distance traveled for 20 min in the open field test by P21 WT mice injected with AAV-EGFP or AAV-PKI medial striatum at P8. (B) Mean  $\pm$  SEM of total distance traveled in the center of arena. (C) Mean  $\pm$  SEM of the ratio of distance traveled in the center of the arena over total distance traveled. (D) Mean  $\pm$  SEM total grooming time of P21 WT mice expressing GFP or PKI in the open-field. (E) Mean  $\pm$  SEM number of and (F) duration of grooming bouts per session. (F) Mean  $\pm$  SEM Number of wall rearing bouts per session.

**Supplemental Table 1-** Related to Figures 2D and 2E. Abundance levels of proteins with significant expression changes P8-P18 ( $p < 0.0013$ ). Developmental expression index is Log<sub>2</sub> of abundance values normalized to P8.

| Gene name | Developmental expression Index (Log <sub>2</sub> ) | P8 – abundance | P12 – abundance | P14 – abundance | P18 – abundance |
|-----------|----------------------------------------------------|----------------|-----------------|-----------------|-----------------|
| Shank3    | 1.001422974                                        | 1.56E+07       | 2.09E+07        | 2.81E+07        | 3.13E+07        |
| Dync1h1   | -0.471813639                                       | 2.89E+08       | 2.43E+08        | 2.12E+08        | 2.09E+08        |
| Map1b     | -1.654911085                                       | 7.44E+08       | 3.05E+08        | 2.60E+08        | 2.36E+08        |
| Golgb1    | -0.560994839                                       | 1.40E+07       | 1.51E+07        | 1.43E+07        | 9.48E+06        |
| Sptbn2    | 0.345359316                                        | 3.21E+07       | 3.84E+07        | 4.08E+07        | 3.91E+07        |
| Fasn      | -1.141840815                                       | 2.02E+08       | 1.45E+08        | 1.09E+08        | 9.14E+07        |
| Rrbp1     | -0.592640033                                       | 3.51E+07       | 3.93E+07        | 2.80E+07        | 2.33E+07        |
| Mycbp2    | -0.955232055                                       | 2.09E+07       | 1.43E+07        | 1.20E+07        | 1.08E+07        |
| Map2      | -0.877343301                                       | 6.48E+07       | 4.11E+07        | 3.53E+07        | 4.01E+07        |
| Lrp1      | -1.325891641                                       | 7.63E+07       | 5.13E+07        | 4.21E+07        | 3.04E+07        |
| Myo5a     | -0.516578781                                       | 1.35E+08       | 1.13E+08        | 1.08E+08        | 9.46E+07        |
| Pclo      | 0.247594378                                        | 9.99E+07       | 1.04E+08        | 1.19E+08        | 1.17E+08        |
| Gprin1    | -0.790803702                                       | 6.64E+07       | 5.53E+07        | 4.42E+07        | 3.84E+07        |
| Clip2     | -0.971303718                                       | 3.59E+07       | 2.49E+07        | 2.26E+07        | 1.83E+07        |
| Mapk8ip3  | -0.793195254                                       | 3.05E+07       | 2.71E+07        | 2.29E+07        | 1.76E+07        |
| Snd1      | -0.975069033                                       | 2.06E+07       | 1.39E+07        | 1.37E+07        | 1.05E+07        |
| Cntn1     | -0.477420425                                       | 2.04E+08       | 1.90E+08        | 1.75E+08        | 1.46E+08        |
| Map1a     | -0.226884197                                       | 8.63E+07       | 8.55E+07        | 8.83E+07        | 7.38E+07        |
| Trio      | -0.788461955                                       | 2.87E+07       | 2.06E+07        | 1.91E+07        | 1.66E+07        |
| Bsn       | 0.836166321                                        | 7.95E+07       | 1.08E+08        | 1.42E+08        | 1.28E+08        |
| Dctn1     | -0.133341457                                       | 3.35E+07       | 3.57E+07        | 3.18E+07        | 3.06E+07        |
| Tenm4     | -0.555460767                                       | 7.84E+06       | 6.68E+06        | 6.61E+06        | 5.33E+06        |
| Birc6     | -1.200026146                                       | 8.80E+06       | 6.53E+06        | 5.02E+06        | 3.83E+06        |
| Tubb3     | -1.425857463                                       | 2.96E+08       | 1.98E+08        | 1.50E+08        | 1.10E+08        |
| Cspg4     | -1.119271421                                       | 1.04E+07       | 9.27E+06        | 8.15E+06        | 4.81E+06        |
| Nav1      | -1.23219087                                        | 1.69E+07       | 1.36E+07        | 1.03E+07        | 7.18E+06        |
| Plcb1     | 0.35532532                                         | 8.90E+07       | 1.14E+08        | 1.07E+08        | 8.91E+07        |
| Kif21b    | -1.627549694                                       | 4.13E+07       | 3.50E+07        | 1.79E+07        | 1.34E+07        |
| Kidins220 | -0.888611119                                       | 6.39E+06       | 4.56E+06        | 4.21E+06        | 3.45E+06        |
| Vcp       | -0.364353809                                       | 6.68E+07       | 5.74E+07        | 5.19E+07        | 5.20E+07        |
| Srgap2    | -1.109706268                                       | 2.16E+07       | 1.51E+07        | 1.21E+07        | 1.00E+07        |
| Pi4ka     | 0.496942717                                        | 1.13E+07       | 1.52E+07        | 1.52E+07        | 1.60E+07        |
| Camsap1   | -1.044826875                                       | 2.09E+07       | 1.58E+07        | 1.34E+07        | 1.01E+07        |
| Hspa8     | 0.270495593                                        | 4.00E+08       | 3.65E+08        | 4.35E+08        | 4.82E+08        |
| Syne1     | 0.175561144                                        | 2.89E+07       | 3.03E+07        | 3.26E+07        | 2.94E+07        |
| Vps13d    | -0.345767074                                       | 5.56E+06       | 6.06E+06        | 5.49E+06        | 4.37E+06        |
| Atp1a1    | 0.812063113                                        | 9.93E+07       | 1.50E+08        | 1.74E+08        | 1.74E+08        |
| Rab3c     | 1.364851955                                        | 3.79E+06       | 6.86E+06        | 7.83E+06        | 9.76E+06        |
| Dbn1      | -1.776520668                                       | 5.13E+07       | 2.79E+07        | 2.15E+07        | 1.50E+07        |
| Tnik      | -0.241910063                                       | 1.12E+07       | 1.13E+07        | 1.02E+07        | 9.50E+06        |
| Cltc      | 0.85025068                                         | 2.28E+08       | 3.33E+08        | 3.58E+08        | 4.12E+08        |
| Vwa8      | -0.11388885                                        | 2.13E+07       | 2.01E+07        | 2.10E+07        | 1.96E+07        |
| Ywhaz     | 0.348601074                                        | 2.31E+08       | 2.56E+08        | 2.52E+08        | 2.94E+08        |
| Tjp2      | -0.505424112                                       | 4.19E+06       | 3.82E+06        | 3.77E+06        | 2.95E+06        |
| Kpnb1     | -1.648047026                                       | 4.28E+07       | 1.86E+07        | 2.32E+07        | 1.37E+07        |
| Psmd1     | -0.874396026                                       | 2.60E+07       | 2.29E+07        | 2.02E+07        | 1.42E+07        |
| Srgap3    | -1.37205892                                        | 3.13E+07       | 2.18E+07        | 1.93E+07        | 1.21E+07        |
| Lppr4     | -0.366664661                                       | 1.79E+07       | 2.34E+07        | 1.85E+07        | 1.39E+07        |
| Hsph1     | 0.35747565                                         | 4.16E+07       | 5.33E+07        | 4.30E+07        | 3.76E+07        |
| Plxnb2    | -0.519235914                                       | 6.68E+06       | 6.26E+06        | 5.73E+06        | 4.66E+06        |
| Igsf3     | -1.85314073                                        | 1.23E+07       | 6.55E+06        | 4.27E+06        | 3.40E+06        |
| Hdlbp     | -1.052422656                                       | 1.70E+07       | 1.22E+07        | 1.19E+07        | 8.20E+06        |
| Ppp1r21   | -0.930192155                                       | 1.43E+07       | 1.23E+07        | 1.19E+07        | 7.51E+06        |
| Taok1     | -0.921719076                                       | 1.34E+07       | 9.91E+06        | 9.47E+06        | 7.08E+06        |

|               |              |          |          |          |          |
|---------------|--------------|----------|----------|----------|----------|
| Csnk2a2       | 0.434721145  | 2.67E+06 | 3.05E+06 | 3.27E+06 | 3.61E+06 |
| Eif3a         | -0.326866524 | 4.13E+06 | 4.36E+06 | 3.93E+06 | 3.29E+06 |
| Syn1          | 1.182704702  | 1.14E+08 | 1.81E+08 | 2.23E+08 | 2.59E+08 |
| Plxnd1        | -0.393204593 | 1.00E+07 | 9.51E+06 | 7.96E+06 | 7.64E+06 |
| Ahi1          | 0.262244765  | 4.03E+05 | 3.51E+05 | 4.34E+05 | 4.83E+05 |
| Aars2         | -0.099811608 | 2.50E+06 | 2.36E+06 | 2.40E+06 | 2.33E+06 |
| Kif5b         | -0.813504025 | 4.18E+07 | 4.33E+07 | 3.19E+07 | 2.38E+07 |
| Ruvbl2        | -0.94283616  | 3.77E+06 | 1.96E+06 | 2.12E+06 | 2.27E+06 |
| Rabep1        | -0.904507475 | 3.95E+07 | 3.71E+07 | 3.29E+07 | 2.11E+07 |
| Cat           | -0.970097959 | 1.50E+07 | 1.42E+07 | 9.64E+06 | 7.66E+06 |
| Stip1         | -0.544978809 | 3.70E+07 | 4.30E+07 | 3.17E+07 | 2.53E+07 |
| Hyou1         | -0.237788772 | 2.29E+07 | 2.53E+07 | 1.94E+07 | 1.96E+07 |
| Tln2          | -0.089365585 | 4.34E+07 | 4.57E+07 | 4.40E+07 | 4.08E+07 |
| ldh3a         | 0.543781337  | 3.08E+08 | 3.24E+08 | 3.93E+08 | 4.49E+08 |
| Ralgapa1      | -0.941314876 | 3.55E+06 | 3.06E+06 | 2.64E+06 | 1.85E+06 |
| Nedd4         | -0.562162773 | 1.15E+07 | 1.08E+07 | 9.73E+06 | 7.76E+06 |
| Nbea          | -0.692597913 | 2.81E+07 | 2.57E+07 | 2.25E+07 | 1.74E+07 |
| Pcdha9        | -0.617110757 | 9.19E+05 | 7.98E+05 | 7.87E+05 | 5.99E+05 |
| Akap12        | -1.723031147 | 1.58E+07 | 9.07E+06 | 6.68E+06 | 4.79E+06 |
| 2010300C02Rik | 0.443967445  | 5.38E+06 | 6.08E+06 | 7.32E+06 | 5.16E+06 |
| Rab11fip5     | -1.080911643 | 5.56E+06 | 3.92E+06 | 3.97E+06 | 2.63E+06 |
| Cep170        | -1.694769951 | 3.31E+07 | 1.91E+07 | 1.57E+07 | 1.02E+07 |
| Ppfia3        | -0.275575071 | 2.02E+07 | 1.75E+07 | 1.67E+07 | 1.96E+07 |
| KIAA1109      | -0.450782946 | 1.29E+07 | 1.23E+07 | 1.16E+07 | 9.41E+06 |
| Aco2          | 1.21655633   | 8.16E+07 | 1.33E+08 | 1.42E+08 | 1.90E+08 |
| Ccdc88c       | -1.615961057 | 4.02E+06 | 2.76E+06 | 2.30E+06 | 1.31E+06 |
| Gnao1         | 0.653146394  | 3.40E+08 | 4.68E+08 | 4.77E+08 | 5.34E+08 |
| Tenm1         | -0.706313937 | 7.90E+06 | 6.99E+06 | 5.50E+06 | 4.84E+06 |
| Ppfia2        | -0.58367777  | 1.35E+07 | 1.23E+07 | 1.09E+07 | 9.01E+06 |
| Itsn1         | -0.47969752  | 2.48E+07 | 2.15E+07 | 2.01E+07 | 1.78E+07 |
| Wdfy3         | -0.478377444 | 2.32E+07 | 2.33E+07 | 2.21E+07 | 1.67E+07 |
| Uba1          | -0.823367674 | 7.44E+07 | 6.28E+07 | 5.17E+07 | 4.20E+07 |
| Pitrm1        | 0.171130925  | 3.53E+07 | 3.97E+07 | 3.79E+07 | 3.42E+07 |
| Dpysl2        | -0.281931485 | 5.15E+08 | 5.03E+08 | 4.38E+08 | 4.23E+08 |
| Ptk2          | -0.346553218 | 3.89E+06 | 4.27E+06 | 3.71E+06 | 3.06E+06 |
| Camsap2       | -1.038028349 | 1.05E+07 | 9.26E+06 | 6.93E+06 | 5.10E+06 |
| Hsp90b1       | -0.838538577 | 4.52E+07 | 4.04E+07 | 3.05E+07 | 2.53E+07 |
| Myo9a         | -0.798123774 | 2.68E+06 | 2.16E+06 | 1.79E+06 | 1.54E+06 |
| Ildr2         | 0.338969901  | 2.30E+06 | 2.59E+06 | 2.90E+06 | 2.19E+06 |
| Tkt           | -0.712609064 | 1.49E+08 | 1.22E+08 | 1.02E+08 | 9.12E+07 |
| Dpp3          | -0.520462478 | 4.99E+06 | 4.56E+06 | 3.81E+06 | 3.48E+06 |
| Lmtk2         | -0.640687067 | 2.75E+06 | 2.53E+06 | 2.52E+06 | 1.76E+06 |
| Eif4g3        | -0.208579646 | 1.00E+07 | 9.77E+06 | 9.23E+06 | 8.68E+06 |
| Trim2         | -0.5439055   | 1.44E+07 | 1.23E+07 | 1.08E+07 | 9.89E+06 |
| Ctnna2        | -0.318202524 | 2.58E+07 | 2.20E+07 | 2.09E+07 | 2.07E+07 |
| Ctnnd2        | -0.478352062 | 3.19E+07 | 2.86E+07 | 2.97E+07 | 2.29E+07 |
| Mrps22        | 0.0753752    | 1.25E+07 | 1.31E+07 | 1.26E+07 | 1.20E+07 |
| Tenm2         | -0.905496021 | 1.55E+07 | 1.01E+07 | 9.23E+06 | 8.25E+06 |
| Maoa          | -0.327848929 | 1.68E+07 | 1.34E+07 | 1.35E+07 | 1.52E+07 |
| Shroom2       | -0.611284038 | 4.49E+06 | 4.46E+06 | 3.47E+06 | 2.94E+06 |
| Cct3          | 0.440224679  | 3.22E+07 | 3.38E+07 | 3.29E+07 | 4.37E+07 |
| Pacs1         | -0.113402687 | 9.49E+06 | 9.85E+06 | 9.66E+06 | 8.77E+06 |
| Glud1         | 0.23413224   | 7.34E+07 | 8.43E+07 | 7.86E+07 | 8.63E+07 |
| Taldo1        | -0.211209467 | 7.17E+06 | 8.87E+06 | 6.67E+06 | 6.19E+06 |
| Dip2b         | -0.175634426 | 9.40E+06 | 1.02E+07 | 9.81E+06 | 8.32E+06 |
| Tnc           | -0.3501458   | 6.59E+06 | 9.17E+06 | 7.14E+06 | 5.17E+06 |
| Strn3         | -1.005389693 | 1.07E+06 | 6.94E+05 | 6.91E+05 | 5.32E+05 |
| Iqsec1        | -0.365957713 | 1.64E+07 | 1.27E+07 | 1.58E+07 | 1.41E+07 |
| Gprin3        | 0.236745315  | 2.14E+07 | 2.47E+07 | 2.28E+07 | 2.53E+07 |
| Dnajb1        | -1.18977726  | 2.30E+06 | 1.62E+06 | 1.52E+06 | 1.01E+06 |
| Ap3b2         | -0.458225302 | 1.44E+07 | 1.17E+07 | 1.21E+07 | 1.05E+07 |
| Ptpst         | -0.701958837 | 3.95E+06 | 3.40E+06 | 2.93E+06 | 2.43E+06 |
| Tax1bp1       | -0.799618554 | 4.16E+06 | 3.48E+06 | 3.25E+06 | 2.39E+06 |

|               |              |          |          |          |          |
|---------------|--------------|----------|----------|----------|----------|
| Mark1         | -0.202690217 | 1.48E+07 | 1.29E+07 | 1.35E+07 | 1.43E+07 |
| Epn2          | -0.733515679 | 1.55E+07 | 1.26E+07 | 1.41E+07 | 9.32E+06 |
| Exoc8         | -1.044049777 | 2.34E+07 | 1.70E+07 | 1.50E+07 | 1.14E+07 |
| P4hb          | -0.559677519 | 5.68E+07 | 4.43E+07 | 3.90E+07 | 3.85E+07 |
| Sirt2         | 1.627250289  | 1.39E+07 | 3.63E+07 | 3.94E+07 | 4.28E+07 |
| Ipo5          | -0.510386159 | 1.53E+07 | 1.07E+07 | 1.13E+07 | 1.21E+07 |
| Phb2          | 0.155617366  | 1.43E+08 | 1.45E+08 | 1.56E+08 | 1.59E+08 |
| Baiap2        | 0.829496395  | 3.07E+07 | 4.64E+07 | 5.43E+07 | 5.45E+07 |
| Atp8a1        | -1.993979354 | 6.07E+05 | 2.47E+05 | 1.57E+05 | 1.53E+05 |
| Nav3          | -1.034774628 | 1.34E+07 | 1.05E+07 | 8.63E+06 | 6.55E+06 |
| Ppp6r2        | -0.082375106 | 4.02E+06 | 4.63E+06 | 4.11E+06 | 3.80E+06 |
| Ehd3          | -0.238647953 | 1.08E+07 | 1.22E+07 | 1.18E+07 | 9.17E+06 |
| Hip1          | -0.764255908 | 1.68E+07 | 1.39E+07 | 1.13E+07 | 9.88E+06 |
| Dlgap4        | 0.86210182   | 3.81E+04 | 5.64E+04 | 6.93E+04 | 4.15E+04 |
| Pcx           | -0.099179004 | 1.48E+06 | 1.50E+06 | 1.40E+06 | 1.38E+06 |
| Immt          | -0.117186848 | 5.27E+05 | 5.09E+05 | 5.56E+05 | 4.86E+05 |
| Sept6         | 0.65522811   | 1.76E+07 | 2.77E+07 | 2.46E+07 | 2.31E+07 |
| Mical3        | -0.827140173 | 2.08E+07 | 1.64E+07 | 1.51E+07 | 1.17E+07 |
| Wdr44         | -0.275552617 | 7.01E+06 | 8.57E+06 | 7.44E+06 | 5.79E+06 |
| Ddx1          | -0.576502132 | 1.25E+07 | 1.17E+07 | 9.71E+06 | 8.37E+06 |
| C530008M17Rik | -0.812550674 | 1.66E+06 | 1.30E+06 | 1.01E+06 | 9.46E+05 |
| Nucb1         | -0.258867824 | 3.11E+06 | 3.05E+06 | 2.60E+06 | 3.25E+06 |
| Hspa4         | -0.630915565 | 5.09E+07 | 4.09E+07 | 4.47E+07 | 3.29E+07 |
| Itpr1         | 1.062369778  | 2.73E+07 | 5.07E+07 | 5.71E+07 | 5.11E+07 |
| Gpd2          | 1.306858306  | 1.99E+07 | 2.36E+07 | 2.94E+07 | 4.92E+07 |
| Epb41l2       | 0.63662181   | 1.55E+07 | 2.41E+07 | 2.41E+07 | 2.29E+07 |
| Shank3        | 1.001422974  | 1.56E+07 | 2.09E+07 | 2.81E+07 | 3.13E+07 |
